# Supplementary material for: SEMA3C drives cancer growth by transactivating multiple receptor tyrosine kinases via Plexin B1
Source: PubMed Central journal article supplement (PMC5801490; doi:10.15252/emmm.201707689), 2018-01-18

Figure 1C

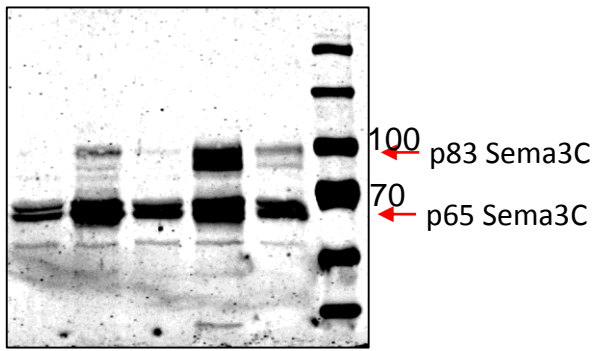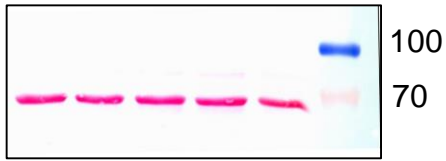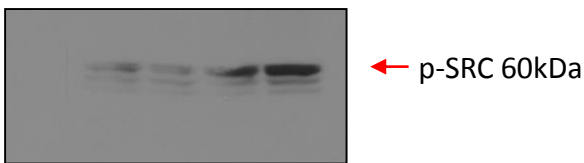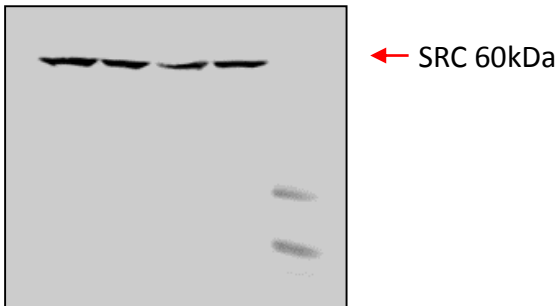

Figure 1D

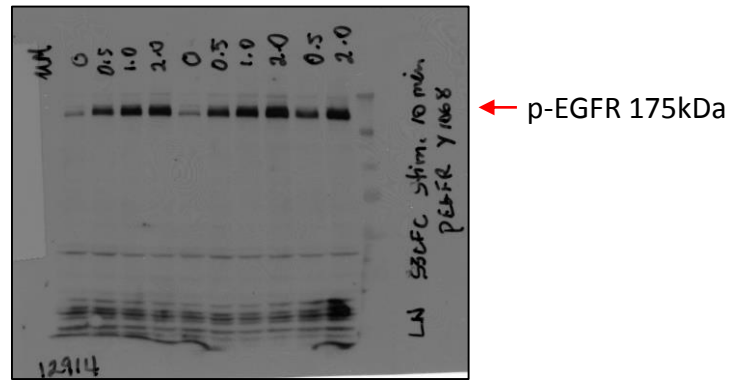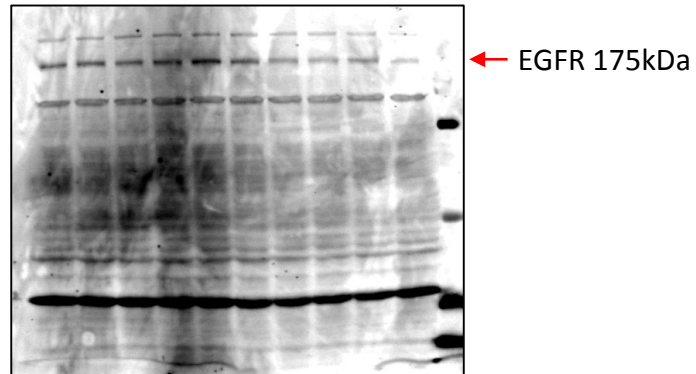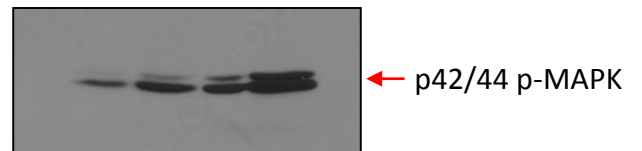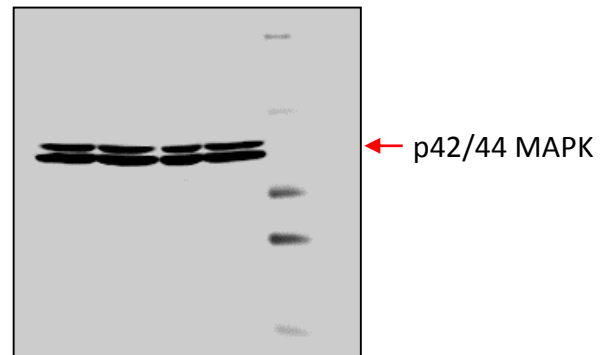

Figure1 D

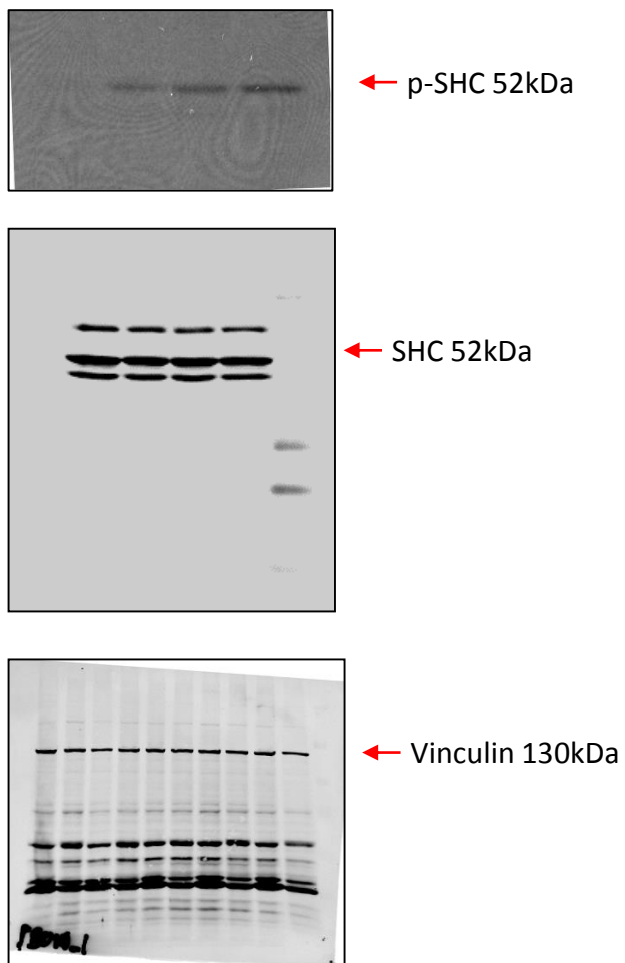

Figure1 F

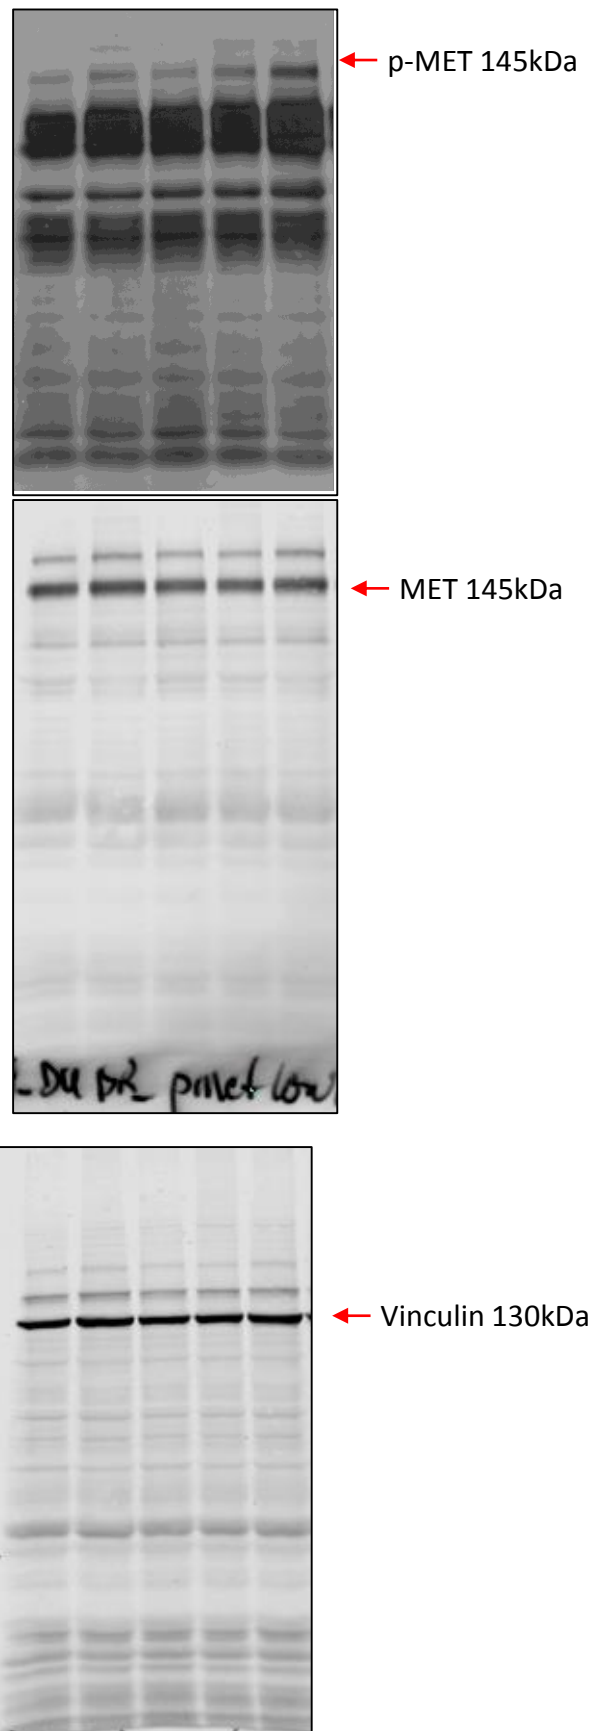

Supplement: EMMM-10-219-s002.pdf [file EMMM-10-219-s002.pdf]
