# Supplementary material for: SEMA3C drives cancer growth by transactivating multiple receptor tyrosine kinases via Plexin B1
Source: PubMed Central journal article supplement (PMC5801490; doi:10.15252/emmm.201707689), 2018-01-18

Figure 2 E

IP

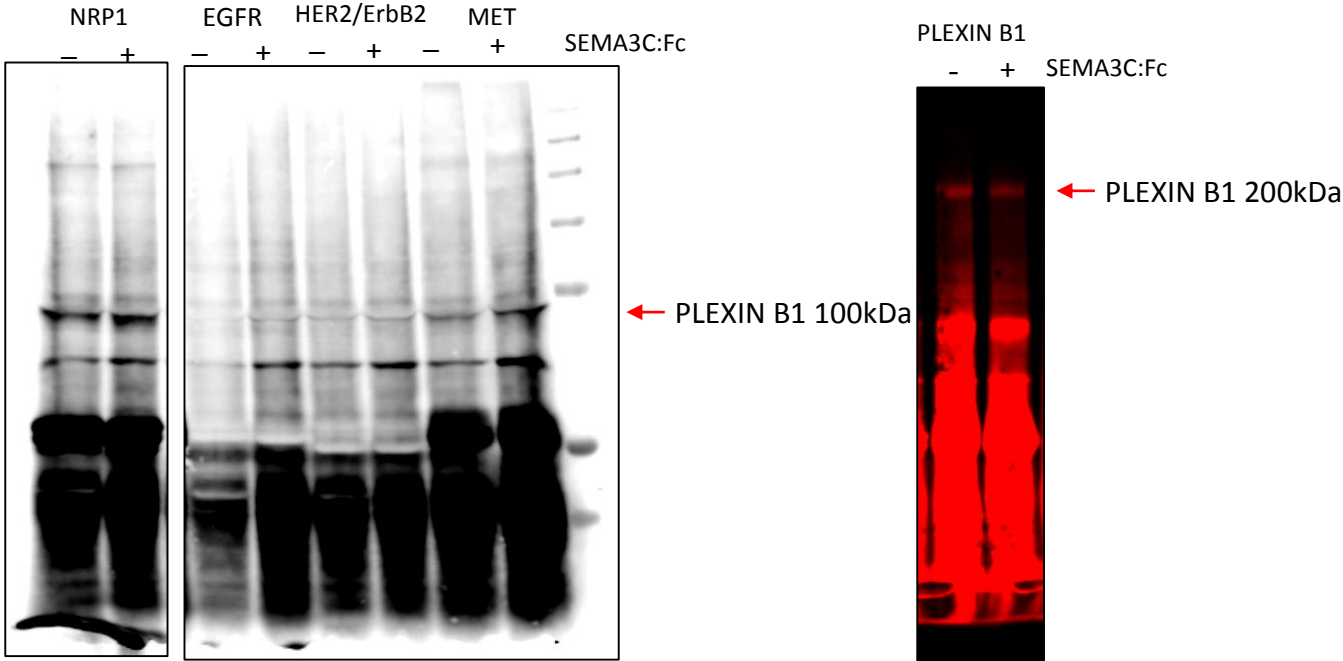

inputs

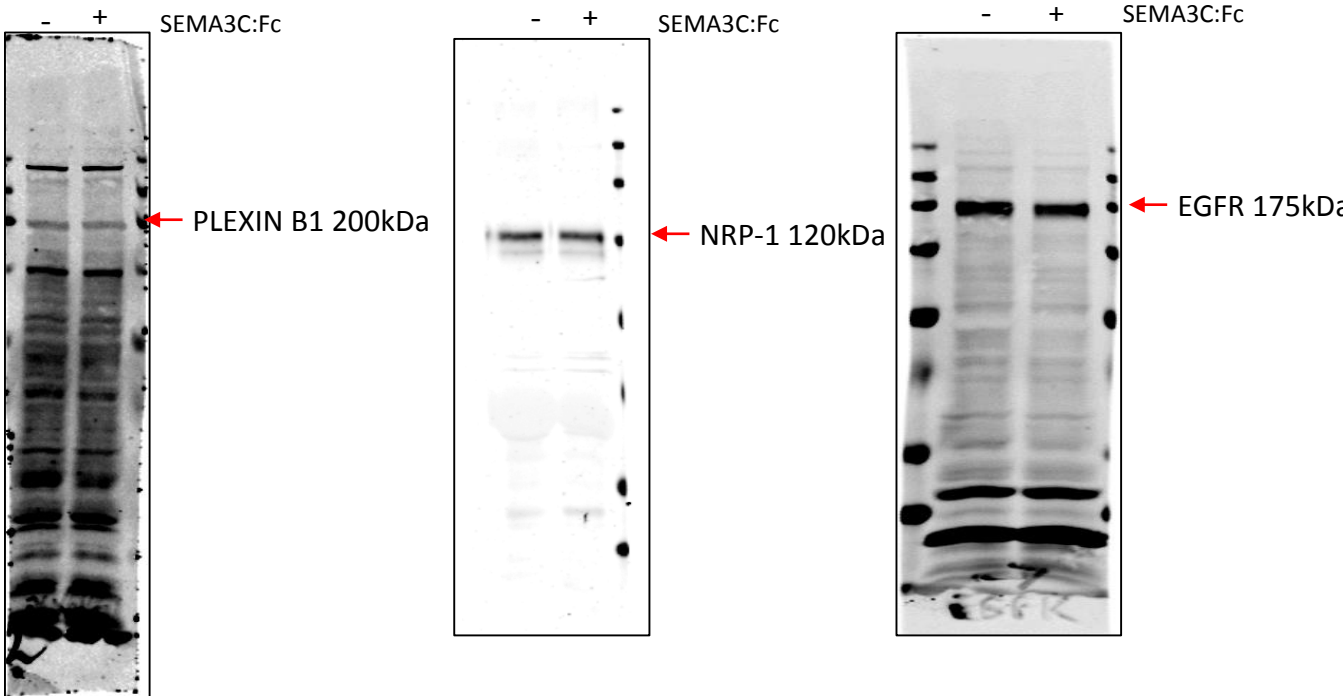

Figure 2 E

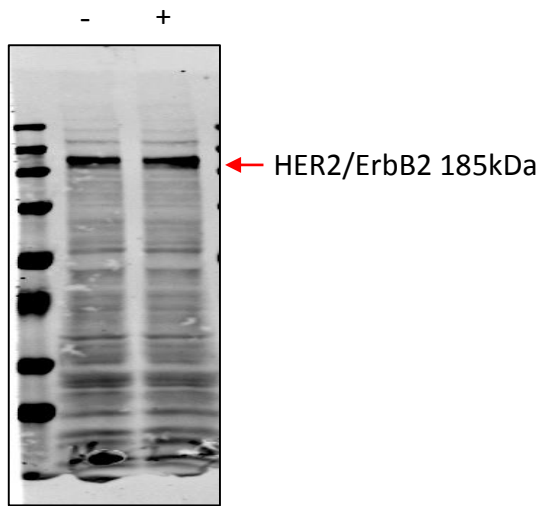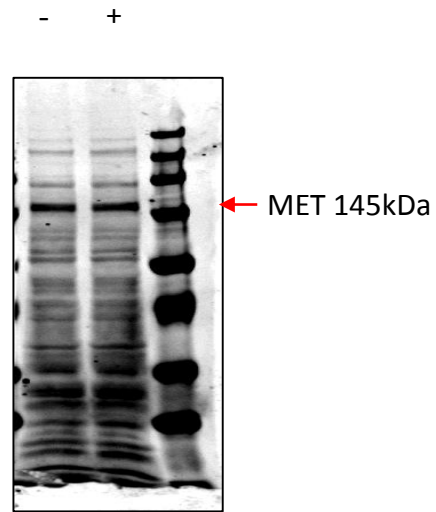

Supplement: EMMM-10-219-s003.pdf [file EMMM-10-219-s003.pdf]
