# Supplementary material for: SEMA3C drives cancer growth by transactivating multiple receptor tyrosine kinases via Plexin B1
Source: PubMed Central journal article supplement (PMC5801490; doi:10.15252/emmm.201707689), 2018-01-18
Supplement: EMMM-10-219-s004.pdf [file EMMM-10-219-s004.pdf]

Figure 3A

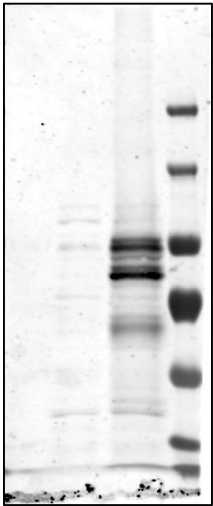

← Sema3C 83kDa

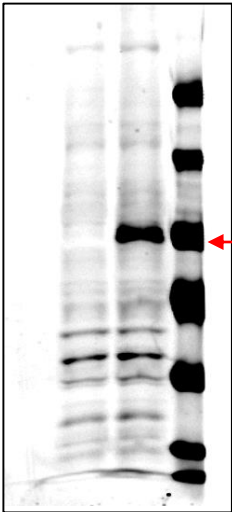

← HIS 83kDa

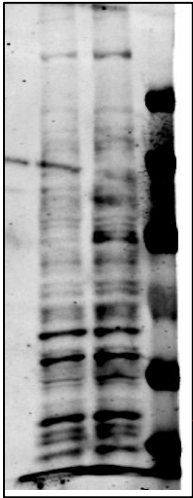

← ACTIN 42kDa
