# Supplementary material for: SEMA3C drives cancer growth by transactivating multiple receptor tyrosine kinases via Plexin B1
Source: PubMed Central journal article supplement (PMC5801490; doi:10.15252/emmm.201707689), 2018-01-18
Supplement: EMMM-10-219-s005.pdf [file EMMM-10-219-s005.pdf]

Figure 4A

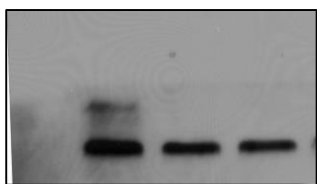

← Sema3C 83kDa

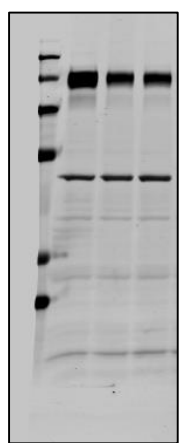

← EGFR 175kDa

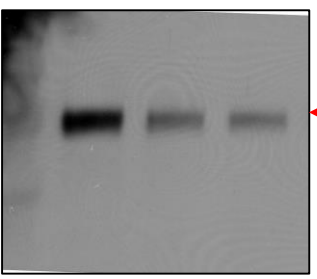

← p-EGFR 175kDa

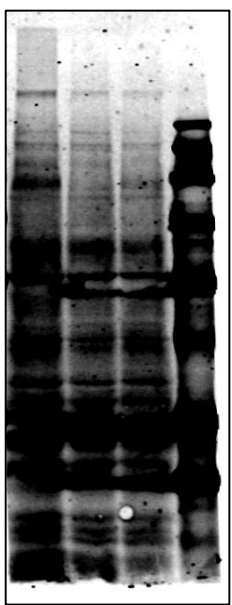

← p-HER2/ErbB2 185kDa

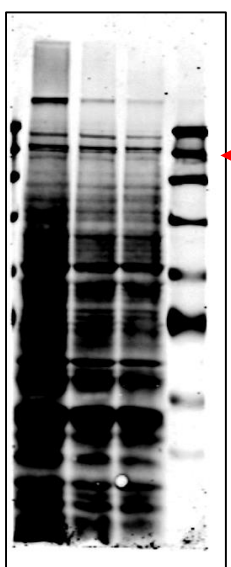

← HER2/ErbB2 185kDa

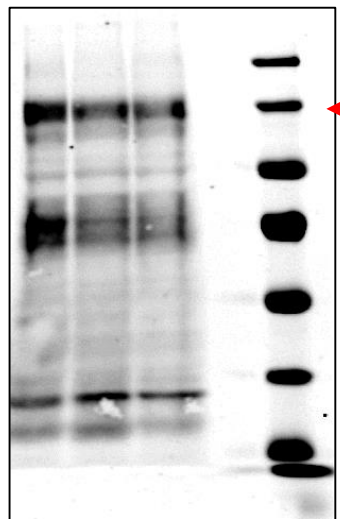

← p-MET 145kDa

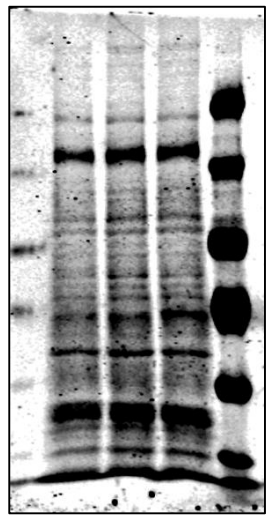

← MET 145kDa

Figure 4A

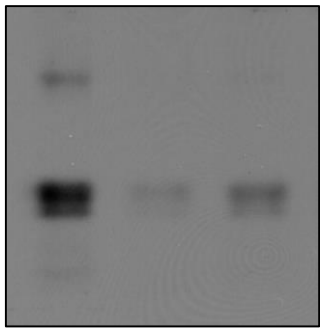

← p-SHC 52kDa

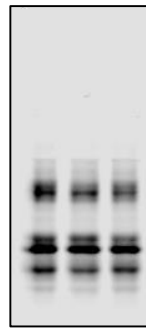

← SHC 52kDa

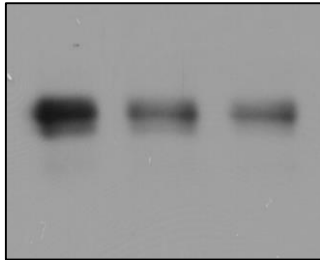

← p-AKT 60kDa

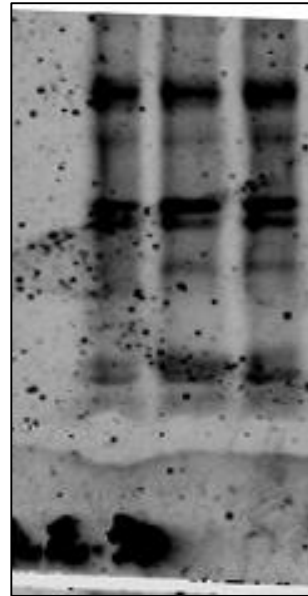

← AKT 60kDa

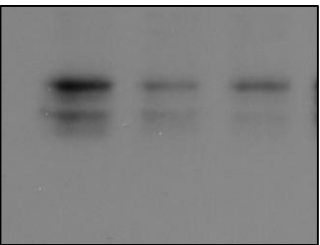

← p-SRC 60kDa

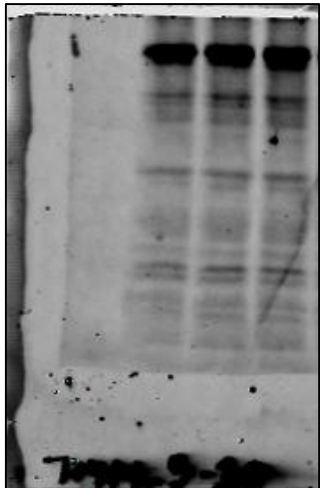

← SRC 60kDa

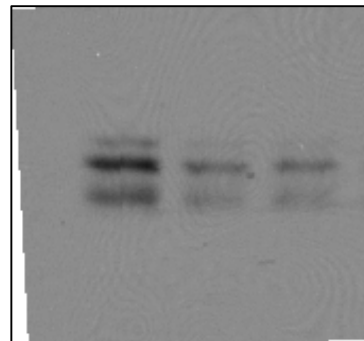

← P42/44 p-MAPK

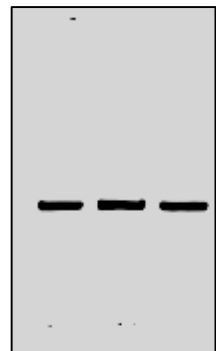

← VINCULIN 130kDa

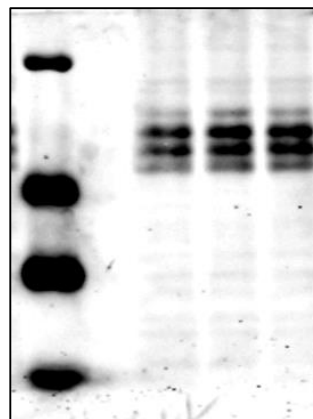

← P42/44 MAPK

Figure 4B

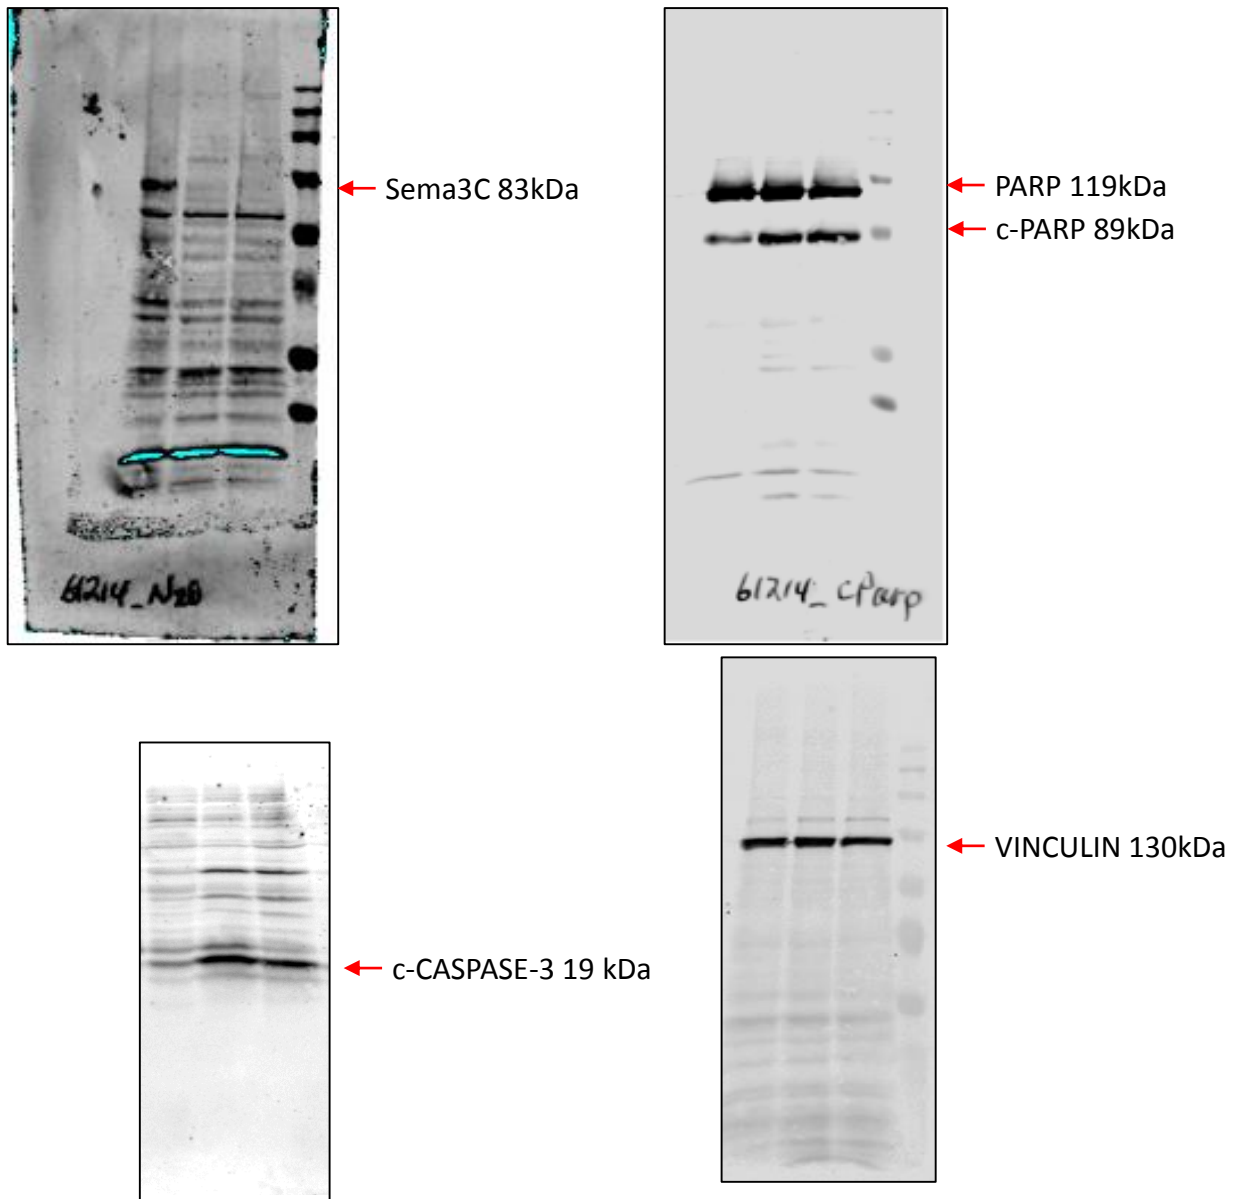

Figure 4C

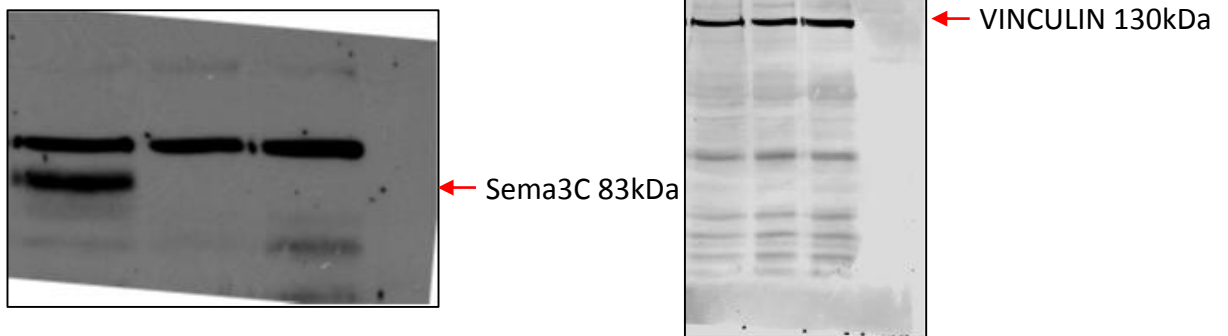

Figure 4D

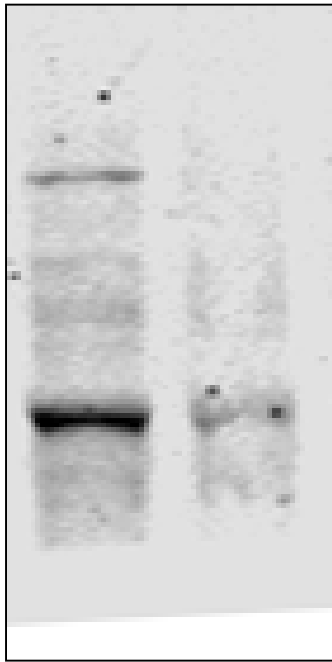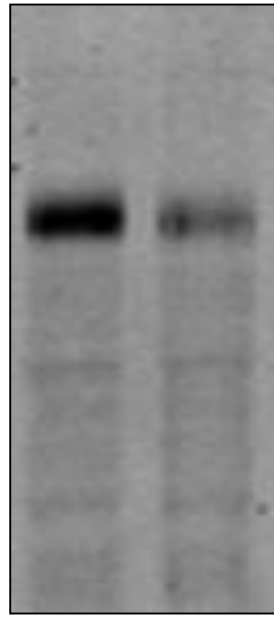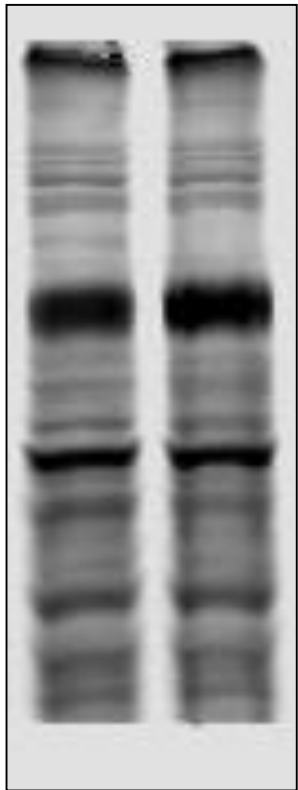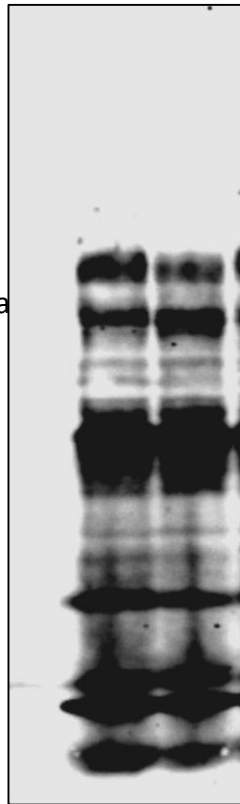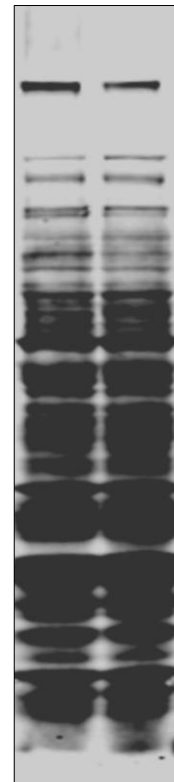

Figure 4D

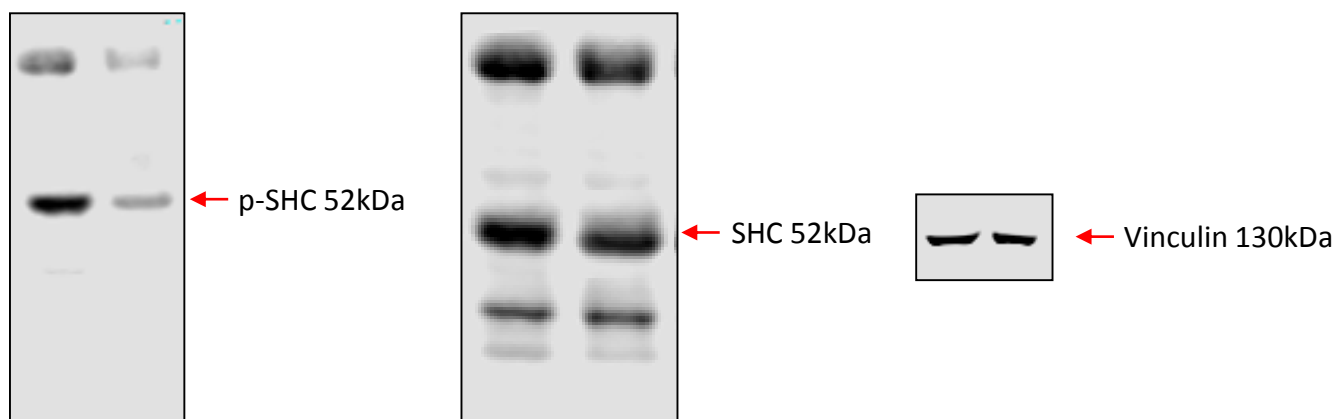

Figure 4H

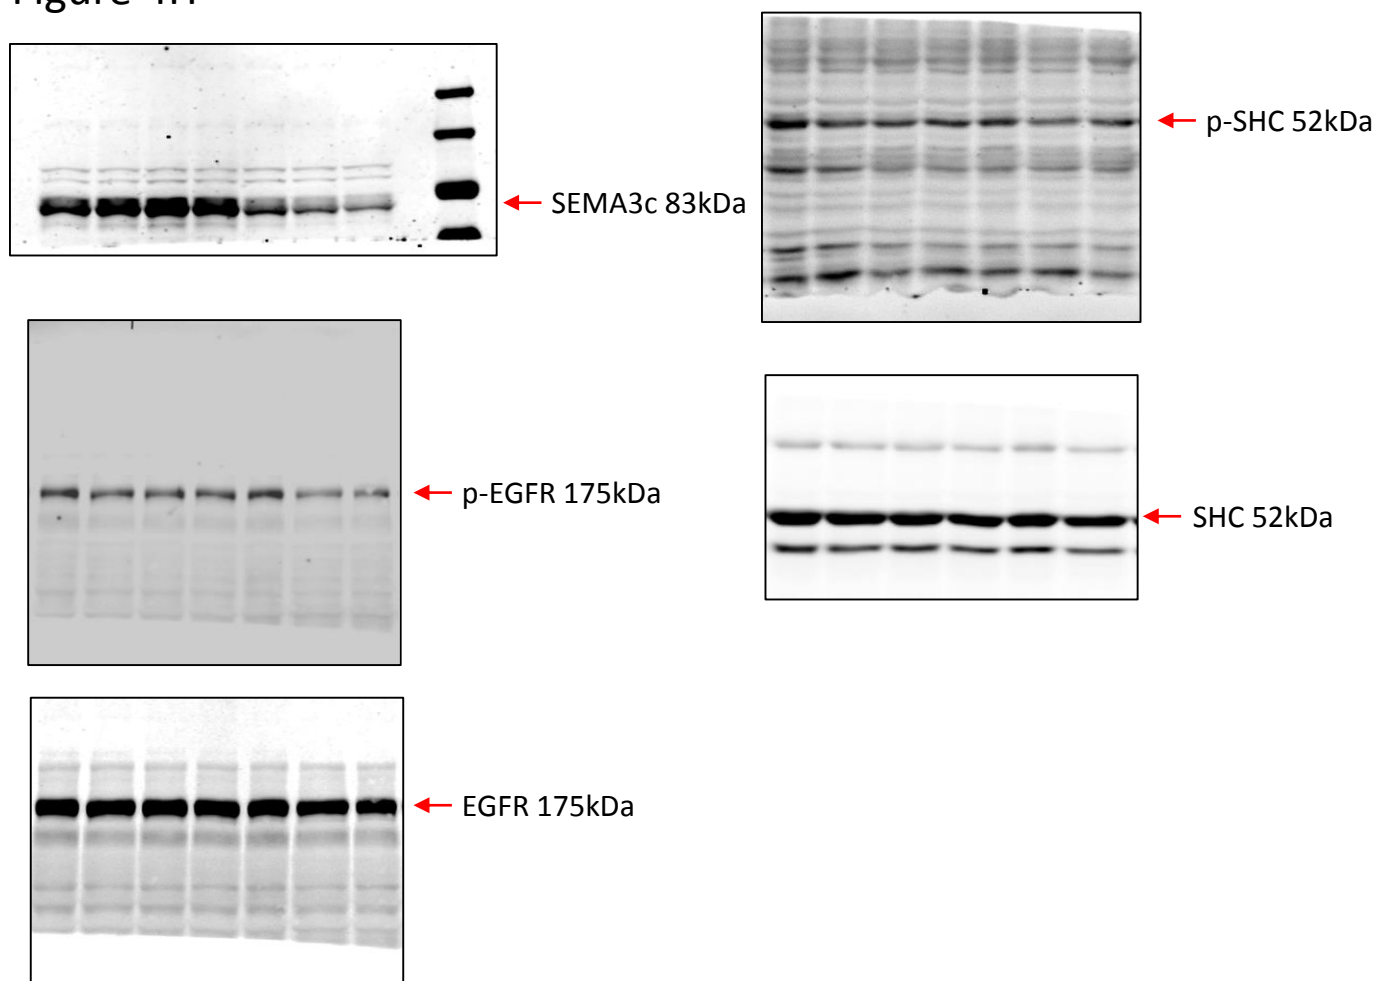

Figure 4H

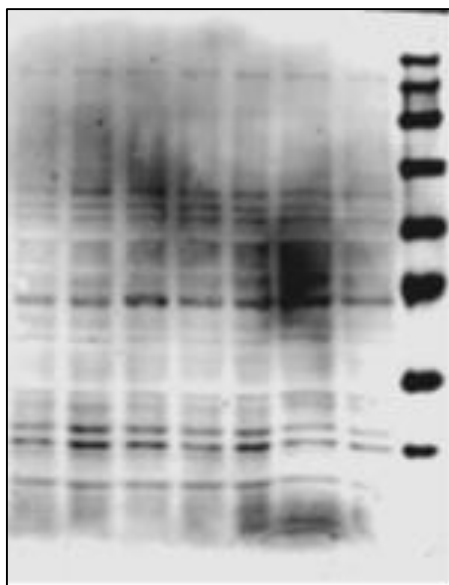

← p42/44 p-MAPK

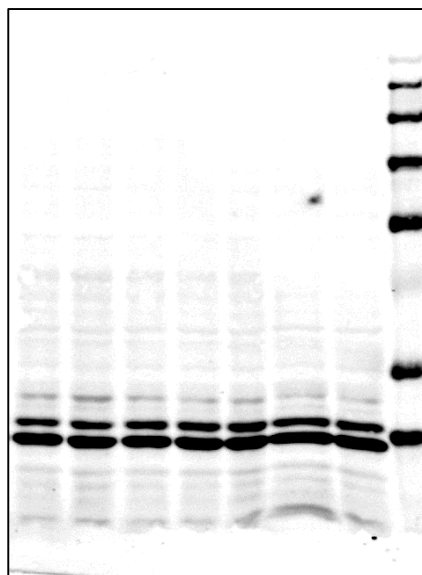

← p42/44 MAPK

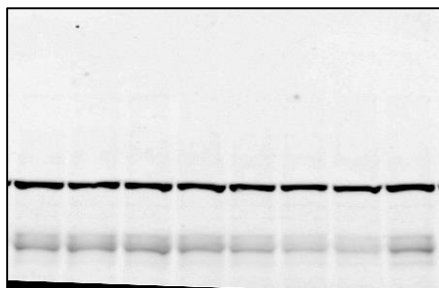

← Vinculin 130kDa

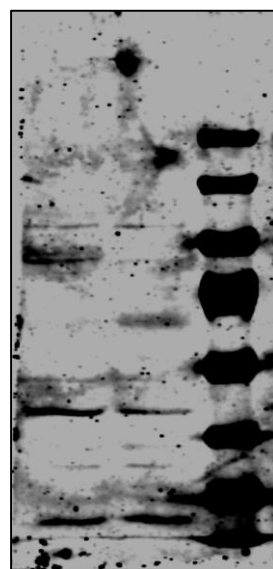

← SEMA3c 83kDa

Figure 4I

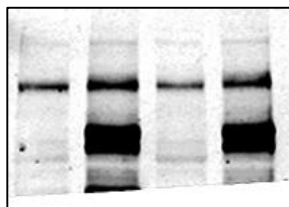

← p-EGFR 175kDa

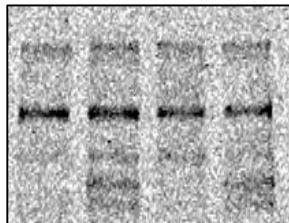

← EGFR 175kDa

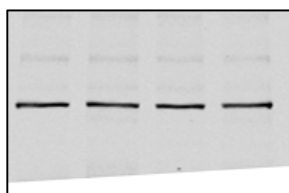

← Vinculin 130kDa

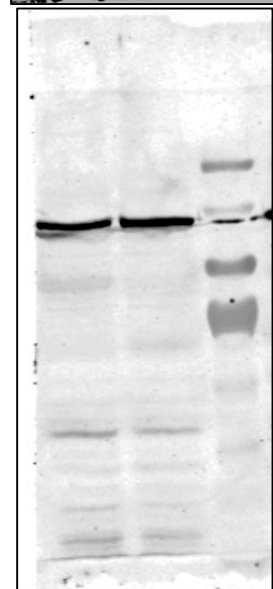

← Vinculin 130kDa
