# Supplementary material for: SEMA3C drives cancer growth by transactivating multiple receptor tyrosine kinases via Plexin B1
Source: PubMed Central journal article supplement (PMC5801490; doi:10.15252/emmm.201707689), 2018-01-18
Supplement: EMMM-10-219-s006.pdf [file EMMM-10-219-s006.pdf]

Experiment repeated independently to provide source data

Figure 6B

control  
Scr ASO 100 nM  
Scr ASO 250 nM  
SEMA3C ASO 100nM  
SEMA3C ASO 250nM

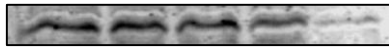

SEMA3C 83kDa

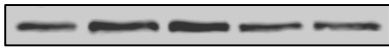

AR 110kDa

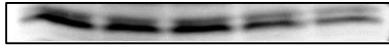

PSA 26kDa

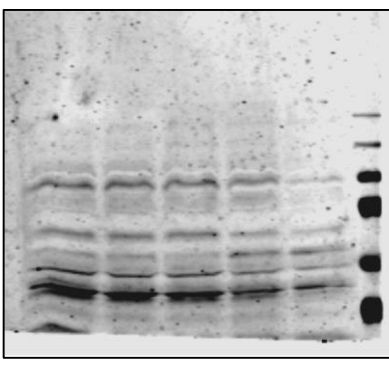

SEMAPHORIN 3C 83kDa

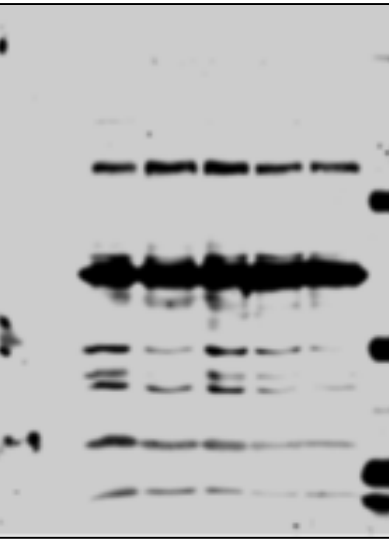

AR 110kDa

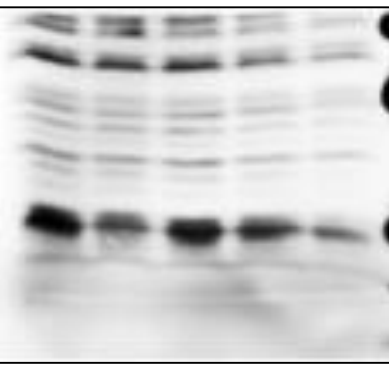

PSA 26kDa

Figure 6C

control  
Scr ASO 100 nM  
Scr ASO 250 nM  
SEMA3C ASO 100nM  
SEMA3C ASO 250nM

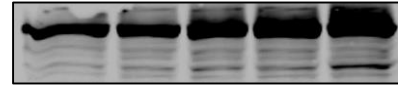

cPARP 89kDa

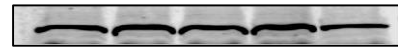

VINCULIN 130kDa

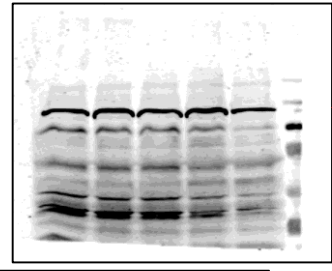

VINCULIN 130kDa

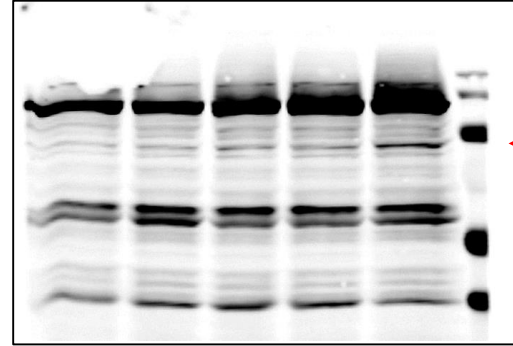

c-PARP 89kDa
