# Supplementary material for: SEMA3C drives cancer growth by transactivating multiple receptor tyrosine kinases via Plexin B1
Source: PubMed Central journal article supplement (PMC5801490; doi:10.15252/emmm.201707689), 2018-01-18
Supplement: EMMM-10-219-s007.pdf [file EMMM-10-219-s007.pdf]

Figure 7D

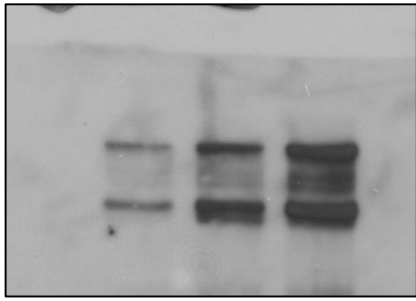

← PLEXIN B1 100kDa

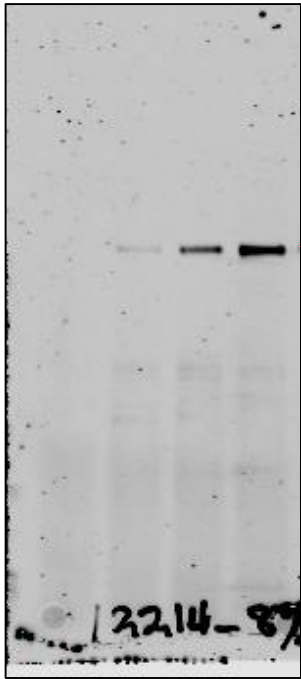

← NRP-1 120kDa
