# Supplementary material for: SEMA3C drives cancer growth by transactivating multiple receptor tyrosine kinases via Plexin B1
Source: PubMed Central journal article supplement (PMC5801490; doi:10.15252/emmm.201707689), 2018-01-18
Supplement: EMMM-10-219-s008.pdf [file EMMM-10-219-s008.pdf]

Figure 8D

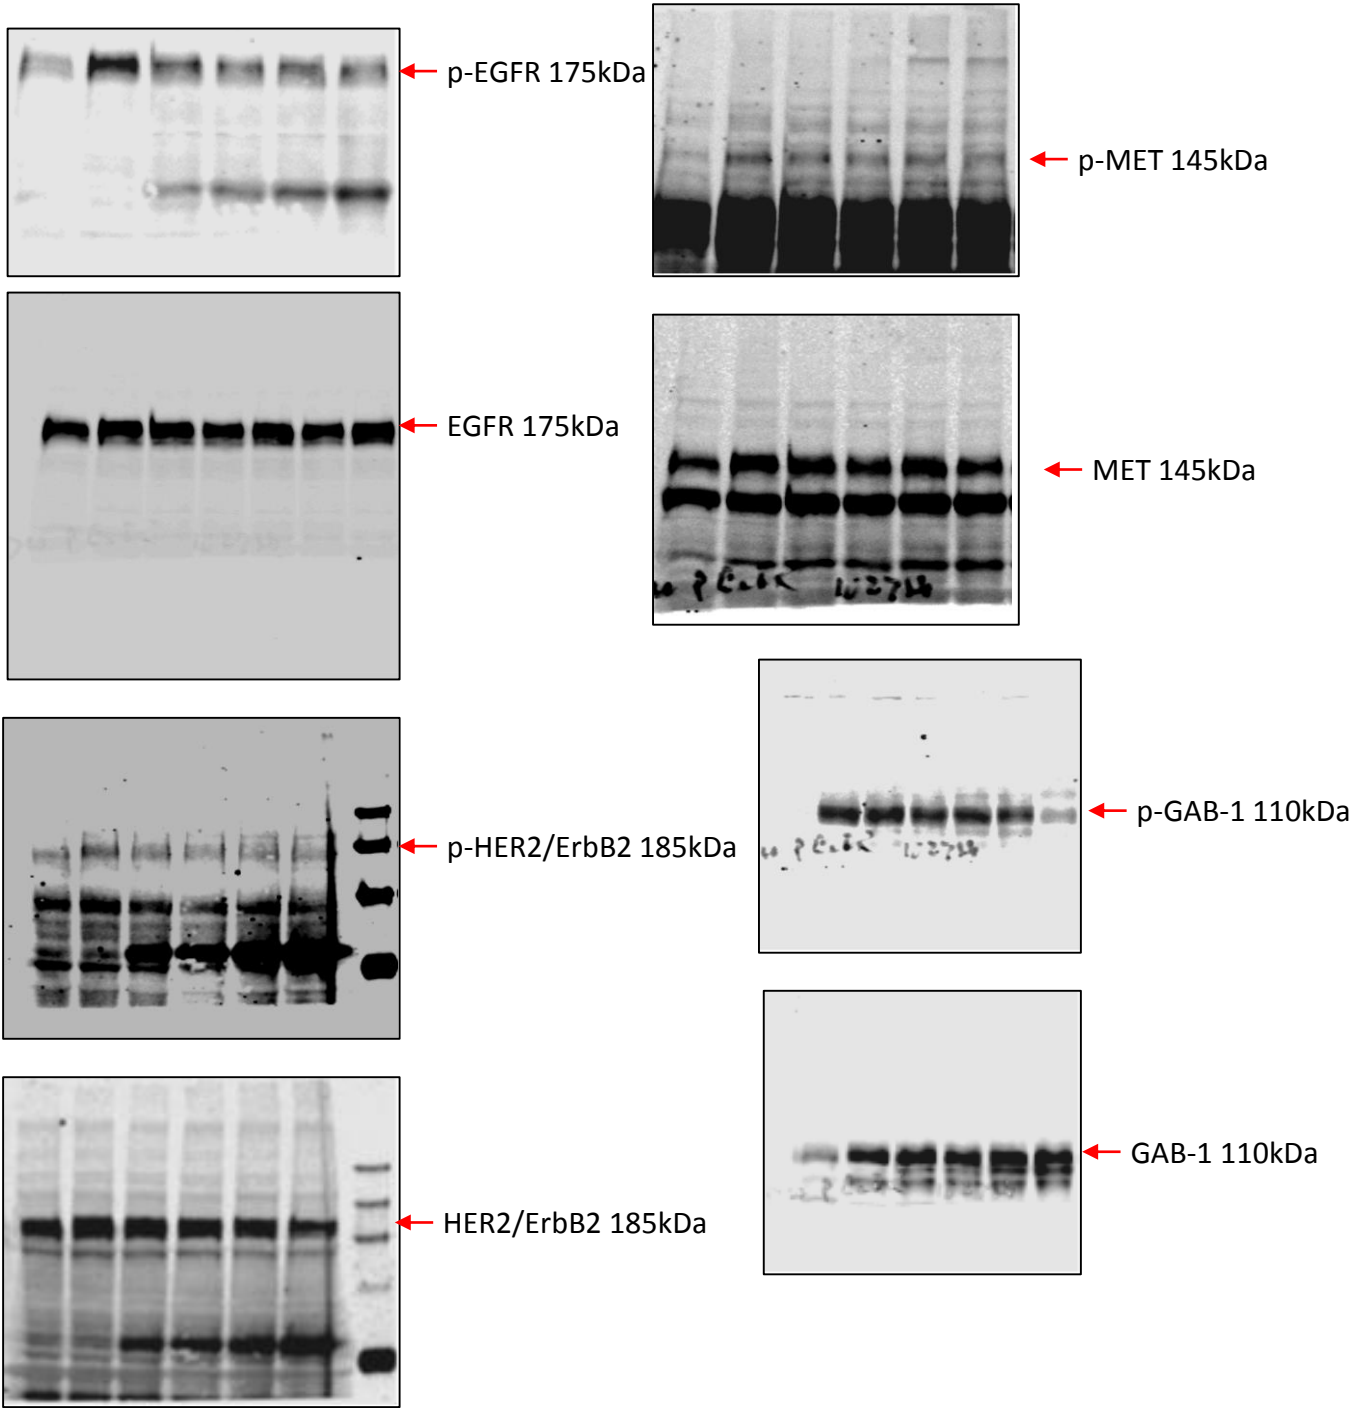

Figure 8D

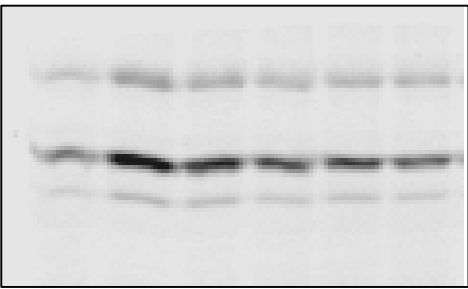

← p-SHC 52kDa

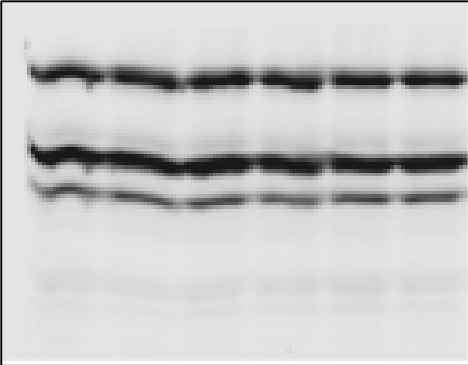

← SHC 52kDa

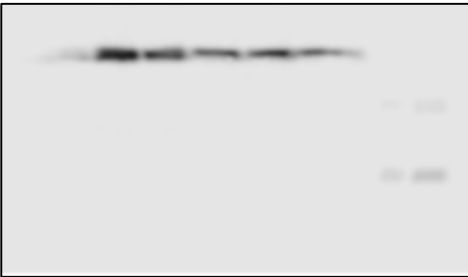

← p-AKT 60kDa

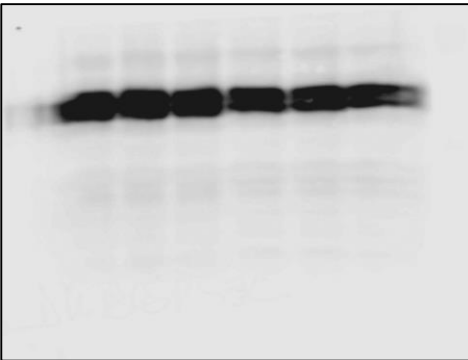

← AKT 60kDa

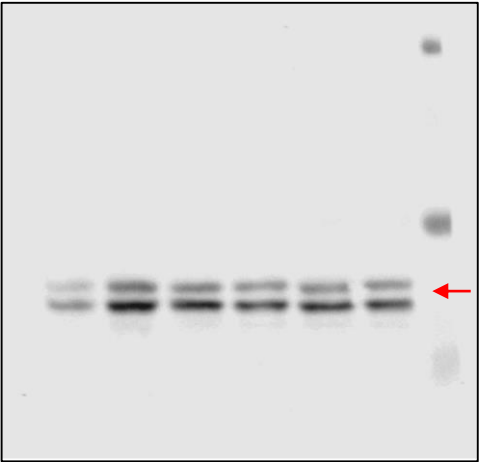

← p42/44 p-MAPK

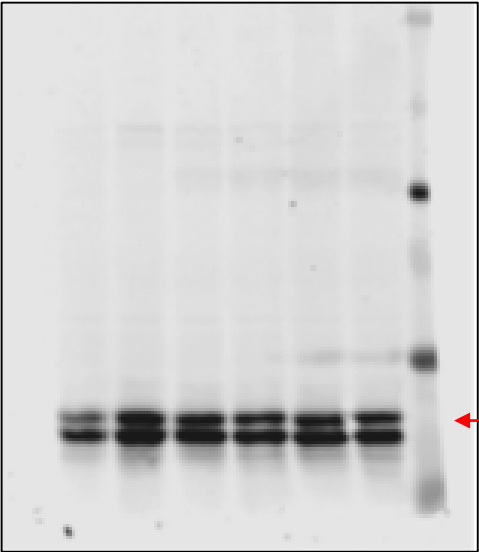

← p42/44 MAPK

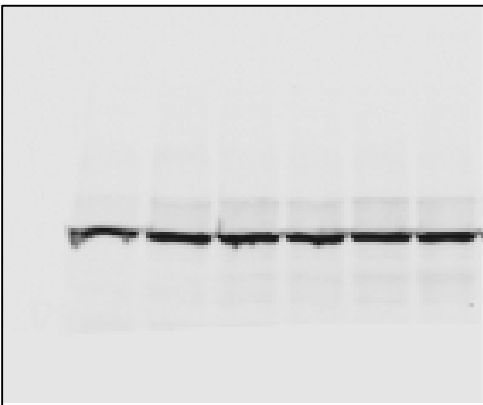

← VINCULIN 130kDa

Figure 8E

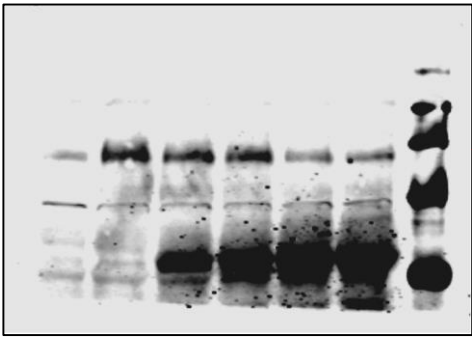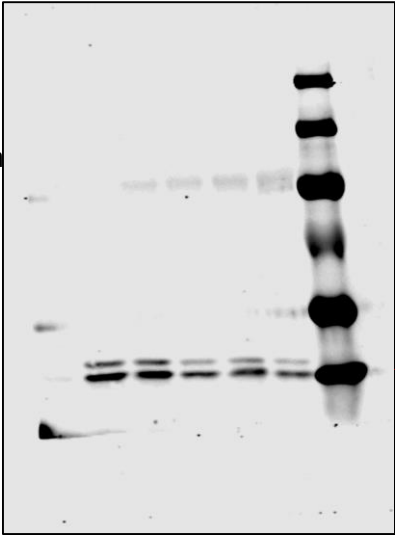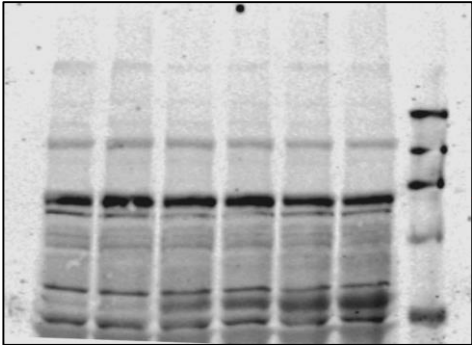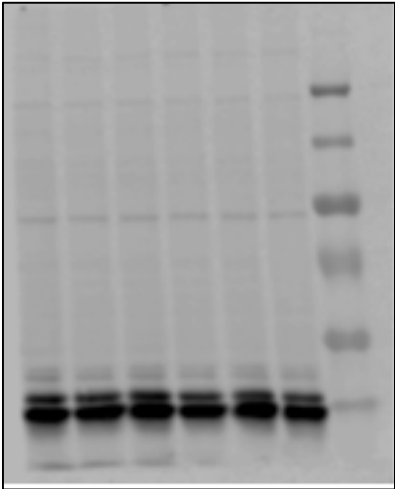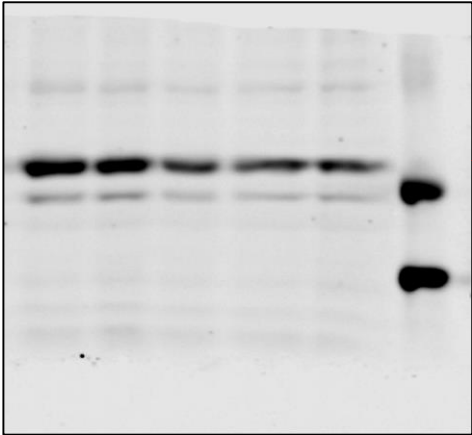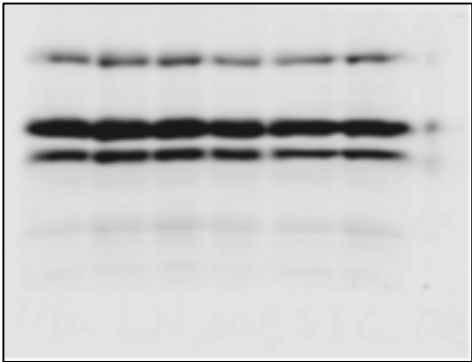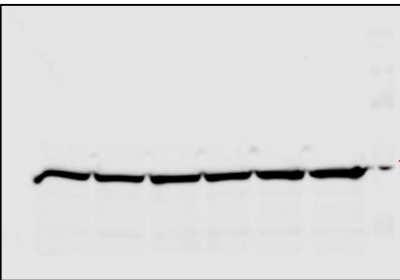

← p-EGFR 175kDa

← p42/44 p-MAPK

← EGFR 175kDa

← p42/44 MAPK

← p-SHC 52kDa

← SHC 52kDa

← VINCULIN 130kDa

Figure 8F

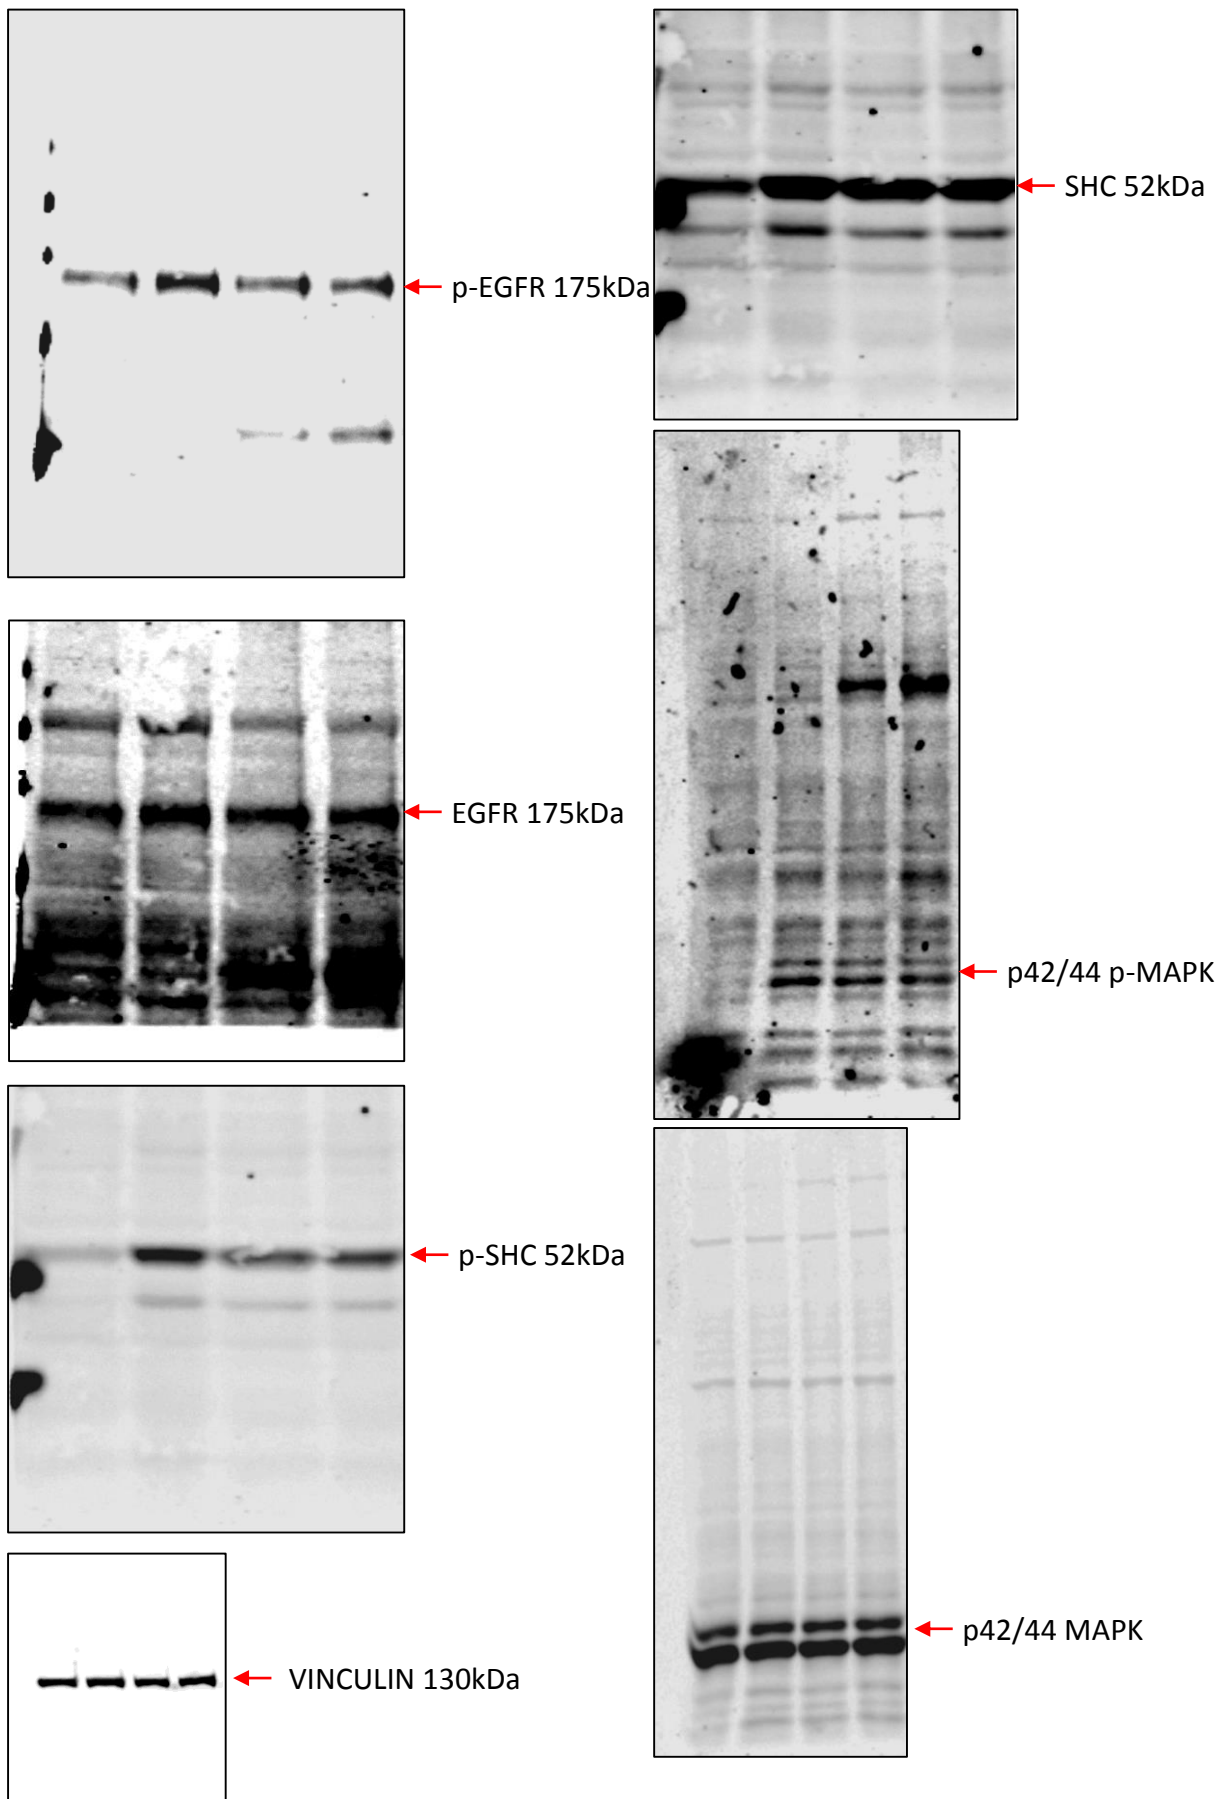

Figure 8G

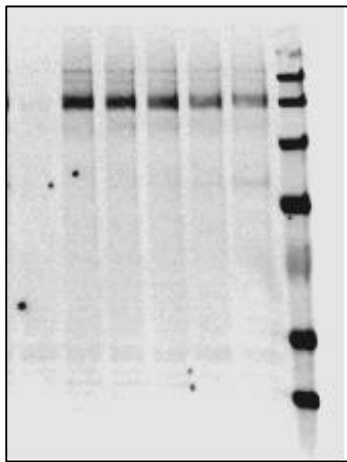

← p-EGFR 175kDa

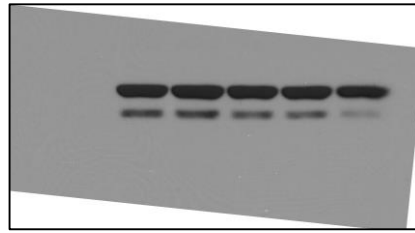

← p-SHC 46kDa

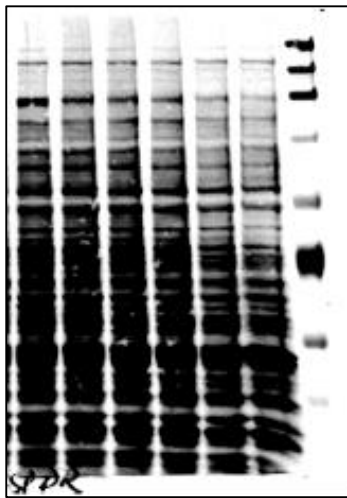

← EGFR 175kDa

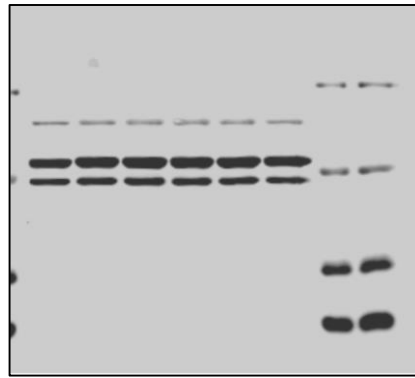

← SHC 46kDa

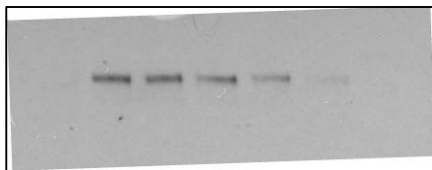

← p-HER2/ErbB2 185kDa

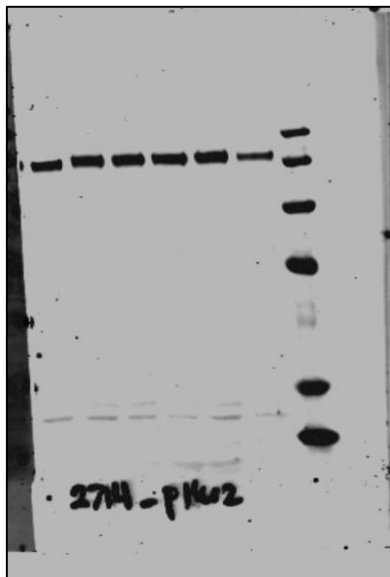

← HER2/ErbB2 185kDa

Figure 8G

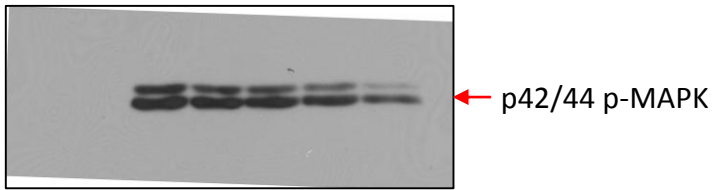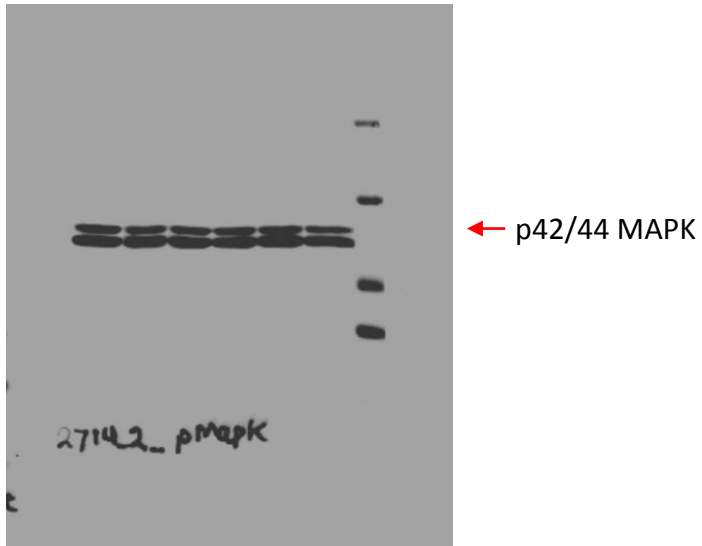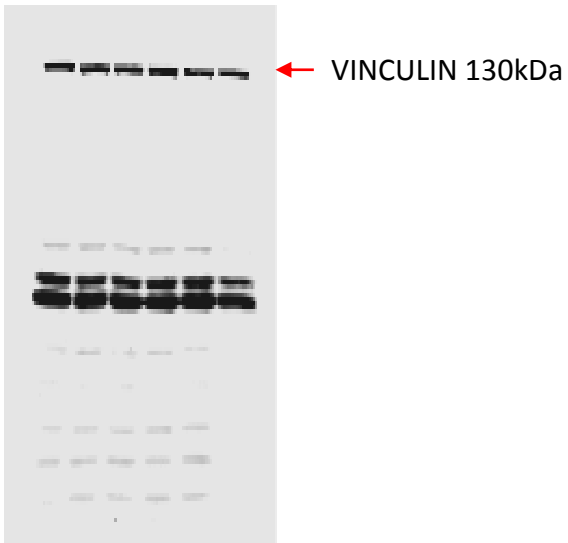

Figure 8H

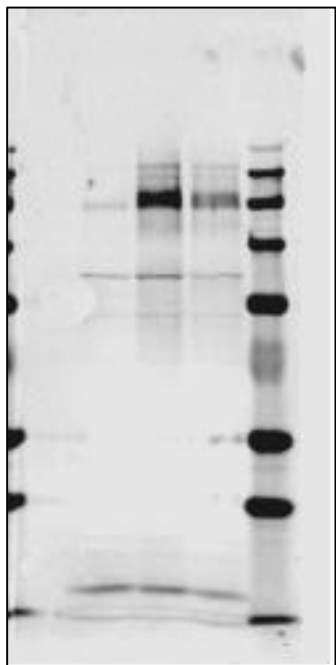

← p-EGFR 175kDa

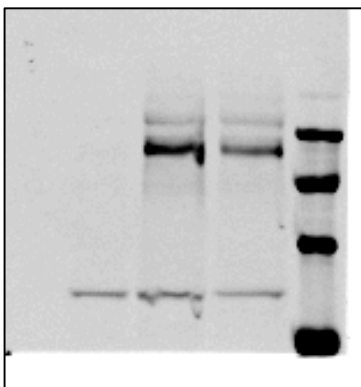

← p-HER2/ErbB2 185kDa

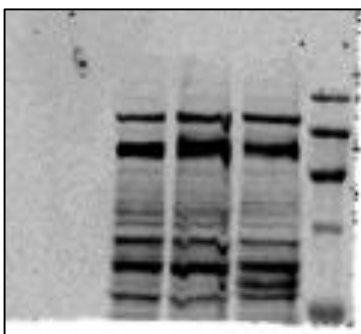

← HER2/ErbB2 185kDa

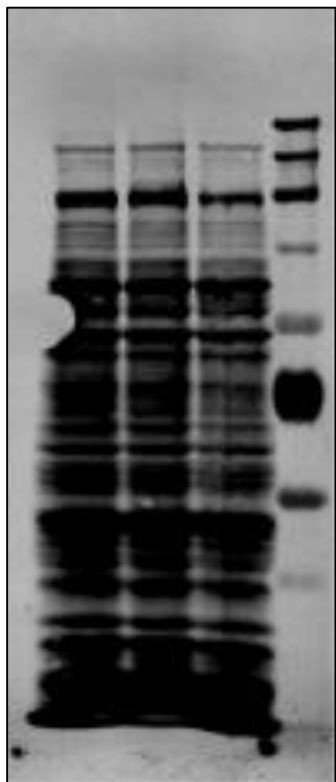

← EGFR 175kDa

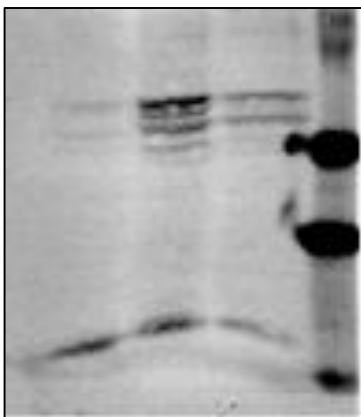

← p-SRC 60kDa

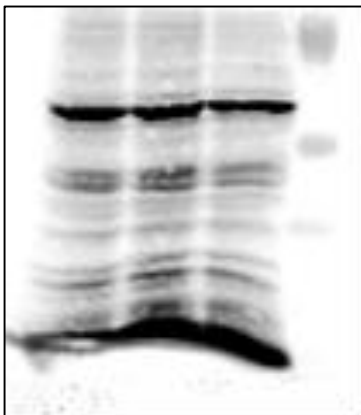

← SRC 60kDa

Figure 8H

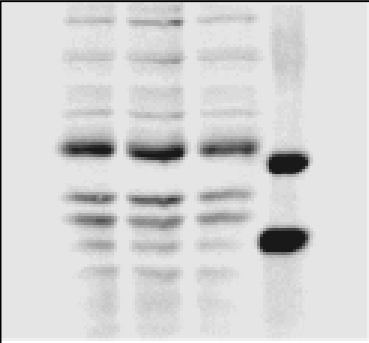

← p-SHC 52kDa

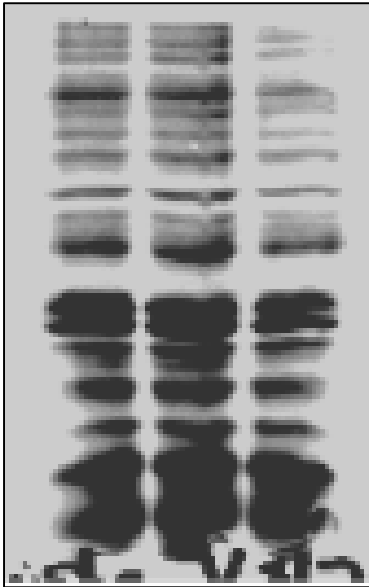

← SHC 52kDa

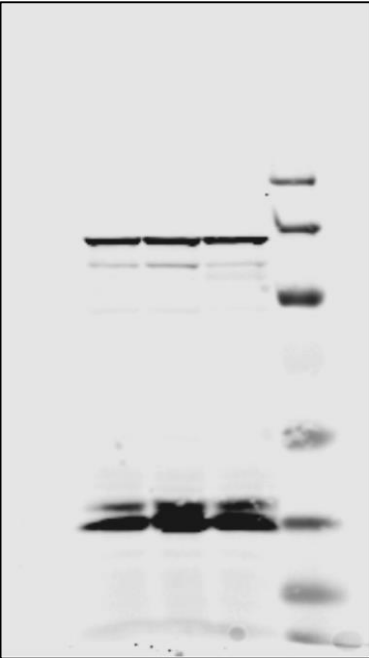

← VINCULIN 130 kDa
